# Supplementary material for: DNA repair in species with extreme lifespan differences
Source: Aging (Albany NY). 2015 Dec 30;7(12):1171–82. doi: 10.18632/aging.100866 (PMC4712340; doi:10.18632/aging.100866)
Supplement: Supplementary file 2 [file aging-07-1171-s002.xlsx]

## Sheet: S1
Table S1. Alignment statistics for each RNA sequencing library
sample	MM1	MM2	MM3	HS1	HS2	HS3	NMR4	NMR5	NMR6
Number of input reads	30179624	23333888	29931952	46112545	79982366	58095061	37073818	69352304	54254478
% Uniquely mapped reads	0.5477	0.6233	0.6574	0.7233	0.7195	0.7407	0.8146	0.7784	0.8059
