# Supplementary material for: DNA repair in species with extreme lifespan differences
Source: Aging (Albany NY). 2015 Dec 30;7(12):1171–82. doi: 10.18632/aging.100866 (PMC4712340; doi:10.18632/aging.100866)
Supplement: Supplementary file 3 [file aging-07-1171-s003.xlsx]

## Sheet: S2
Table S2. Genes encoding proteins involved in DNA repair in human and mouse
gene	hs_nmr prob	hs_nmr log2FC	hs_mm prob	hs_mm log2FC	mm_nmr prob	mm_nmr log2FC
ALKBH2	0.996795	1.76593	0.999854	2.85505	0.904878	-1.08913
ALKBH3	0.0217974	-0.010167	0.000232566	-0.185485	0.301393	0.175318
APEX2	0.2135	-0.264323	0.0107315	0.155015	0.636476	-0.419338
APLF	0.994976	2.35509	0.869453	1.05344	0.883642	1.30166
APTX	0.992844	1.43567	0.516155	0.500694	0.96374	0.93498
ATM	0.0338051	0.0467881	0.882715	0.434958	0.805101	-0.388169
ATR	0.999959	-2.31771	0.995555	-1.18305	0.998466	-1.13467
ATRIP	0.998883	-2.1375	0.907475	-1.10631	0.982448	-1.03119
ATRIP	0.998883	-2.1375	0.907475	-1.10631	0.394028	0.367371
BRCA1	0.968799	-1.66658	0.982277	-2.03395	0.939565	-0.649425
BRCA2	0.999949	-4.27878	0.999714	-3.62936	0.299919	-0.266075
BRIP1	0.999487	-3.11042	0.998044	-2.84435	0.735627	-0.444838
CCNH	0.997163	1.11725	0.999288	1.56209	0.16126	-0.249028
CDKN1A	0.99989	5.4686	1	5.71763	0.290959	0.271302
CHAF1A	0.876843	0.936435	0.438648	0.665133	0.994664	-2.35869
CHEK1	0.869936	-1.10343	0.826534	1.25526	0.0228045	0
CHEK2	0.945849	1.4245	0.881469	1.4245	0.989995	-0.920515
CLK2	0.00414908	-0.111257	0.912683	0.809258	0.990621	0.688594
COPS5	0.930131	0.514833	0.246489	-0.173761	0.999925	1.23678
DCLRE1A	0.997555	-1.45914	0.996057	-1.45795	0.0202846	-0.00118497
DCLRE1B	0.99582	-2.15673	0.981376	-1.74874	0.546494	-0.407983
DCLRE1C	1	-5.95525	0.997644	-2.34792	0.999799	-3.60733
DDB1	0.501028	-0.154552	0.999692	-0.888737	0.999866	0.734184
DMC1	0.154845	-0.584963	0.377421	1	0.952029	-1.58496
DUT	0.791135	0.549952	0.877603	0.813656	0.3784	-0.263704
EME2	0.41897	0.465053	0.921097	-1.0535	0.991985	1.51855
ENDOV	0.848088	0.869744	0.859439	-0.759508	0.993472	1.62925
ERCC3	0.860707	-0.536915	0.846313	-0.493742	0.0818144	-0.0431732
ERCC4	0.999353	-1.98466	0.98462	-1.31079	0.966325	-0.673872
ERCC5	0.999799	-2.69786	0.999505	-2.74366	0.101526	0.0458037
ERCC6	0.813928	-0.719892	0.999613	-2.28104	0.998139	1.56115
EXO1	0.420788	0.722466	0.355037	1.18641	0.243243	-0.463947
FAN1	0.735192	0.388355	0.988899	1.07826	0.961192	-0.689904
FANCB	0.78318	-1.25376	0.97992	-2.27684	0.695369	1.02308
FANCC	0.999906	5.93773	0.99991	3.45421	0.993291	2.48352
FANCD2	0.999999	-4.95658	0.00914807	0.156119	0.999799	-5.1127
FANCE	0.993608	-2.404	0.998231	-3.2085	0.725601	0.804503
FANCG	0.885679	-1.04439	0.0125683	0.311944	0.97435	-1.35634
FANCL	0.999442	2.03659	0.996674	1.46819	0.671064	0.568399
FANCM	0.970986	-1.37397	0.999698	-3.4701	0.997952	2.09612
FEN1	0.0355192	0.157214	0.226048	0.480329	0.262611	-0.323115
GEN1	0.999876	4.03076	0.999261	3.42931	0.482074	0.601451
GPS1	0.724924	0.305076	0.999875	2.02406	0.999618	-1.71898
GTF2H1	0.372792	0.234278	0.982818	-0.643475	0.995694	0.877753
GTF2H2	0.999976	-4.26701	0.984948	-2.14852	0.99956	-2.11849
GTF2H3	0.999867	4.00368	0.818323	0.571262	0.999486	3.43241
GTF2H4	1	-8.54946	1	-8.51307	0.0290928	-0.0363942
GTF2H5	0.996668	-1.93218	0.999705	-3.19103	0.99281	1.25885
H2AFX	0.783411	-0.894647	0.878165	-1.18117	0.324859	0.286523
HELQ	0.986213	-1.07384	0.507453	0.578663	0.998184	-1.65251
HLTF	0.999134	-1.42539	0.000659688	-0.160293	0.997816	-1.2651
LIG4	0.812172	0.648087	0.880959	0.920649	0.364839	-0.272562
MAD2L2	0.999354	2.6368	0.912791	0.957264	0.990994	1.67954
MBD4	0.322275	0.24278	0.999875	4.03128	0.999948	-3.7885
MDC1	1	-8.77259	1	-8.68883	0.11971	-0.0837564
MGMT	0.999893	4.16274	0.999872	2.44257	0.992736	1.72016
MLH1	0.949699	0.574274	0.998855	1.35975	0.968899	-0.785479
MLH3	0.999949	-2.26545	0.949759	-0.882003	0.999526	-1.38344
MNAT1	0.990707	1.25685	0.994987	1.58861	0.474368	-0.331768
MPG	0.987253	1.04175	0.998423	1.79679	0.857553	-0.755048
MRE11A	0.568899	-0.432959	0.00871643	0.0824622	0.751028	-0.515422
MSH2	0.823076	-0.584963	0.40486	-0.426428	0.246024	-0.158534
MSH3	0.000362086	-0.111091	0.999125	1.70969	0.999655	-1.82078
MSH4	0.994364	-3	0.28586	-0.917538	0.961404	-2.08246
MUTYH	0.355015	0.43644	0.999169	3.43644	0.997918	-3
NEIL1	0.813359	0.626482	0.999375	2.81762	0.997104	-2.19114
NEIL2	0.977293	1.29301	0.999118	2.90016	0.978277	-1.60716
NHEJ1	0.993117	1.62361	0.999231	2.76765	0.96174	-1.14405
NTHL1	0.999364	2.1072	0.999847	2.73572	0.716476	-0.628519
NUDT1	0.990822	-1.67029	0.996546	-2.24548	0.728998	0.575181
PARP1	0.97918	0.70089	0.863019	0.444142	0.648492	0.256748
PARP2	0.997844	2.07767	0.000470616	-0.17897	0.998125	2.25664
PARP3	0.999759	2.3938	0.00385369	-0.0570862	0.999827	2.45089
PCNA	0.999898	7.90489	0.0114115	0.154458	0.999926	7.75043
PER1	0.00124588	-0.146196	0.935202	0.980946	0.995098	-1.12714
PMS1	0.0219456	-0.0131354	0.391366	-0.459432	0.550792	0.446296
PMS2	0.98977	-1.12121	0.874907	0.983512	0.998477	-2.10472
PNKP	0.984865	1.21494	0.000403243	-0.156276	0.992944	1.37122
POLB	0.999658	2.95159	0.0115557	0.157484	0.999812	2.7941
POLD1	0.866512	-0.965919	0.0186572	0.298265	0.965357	-1.26418
POLE	0.99972	2.21494	0.999825	2.53687	0.378887	-0.321928
POLH	0.764596	-0.602345	0.728778	-0.682165	0.138844	0.0798201
POLI	0.0241266	0.00841224	0.402046	-0.551015	0.619892	0.559427
POLK	0.0162013	-0.0416692	0.99126	1.27898	0.993928	-1.32065
POLL	0.0441198	0.145948	0.96929	1.23152	0.970051	-1.08558
POLM	0.975064	1.12623	0.99683	1.91269	0.84652	-0.786456
POLQ	0.999355	-4.59991	0.98182	-2.49185	0.985086	-2.10806
PRPF19	0.967592	0.542266	0.937208	-0.437692	0.997955	0.979959
RAD1	0.258327	-0.4458	0.000482812	-0.284977	0.168442	-0.160823
RAD17	0.999806	-1.79114	0.00584127	-0.0140361	0.999803	-1.77711
RAD18	0.999946	-3.6922	0.156852	0.432959	0.999979	-4.12516
RAD23B	0.631544	0.138221	0.486468	0.143674	0.00838392	-0.0054534
RAD50	0.0457553	0.110775	0.871331	0.449205	0.699017	-0.338429
RAD51B	0.9939	2.59585	0.00539218	-0.0427496	0.992341	2.6386
RAD51D	0.999809	-2.3179	0.000453389	-0.246161	0.999576	-2.07174
RBBP8	0.230458	-0.284857	0.556085	0.673822	0.964397	-0.958679
RDM1	0.796059	-1.10962	0.999686	-4.32572	0.998595	3.2161
RFC1	0.0433394	0.0909945	0.991321	0.76207	0.969099	-0.671076
RFC2	0.981816	1.08273	0.0098042	0.0859466	0.977071	0.996783
RFC3	0.743798	0.695145	0.00418714	-0.0938669	0.755671	0.789012
RFC5	0.857814	-0.540692	0.904234	0.856743	0.997742	-1.39744
RIF1	0.993404	-0.881625	0.882116	-0.487108	0.821763	-0.394516
RNF168	0.997244	1.46844	0.865418	0.612406	0.967212	0.856034
RNF4	0.855081	-0.393615	0.999707	-1.43534	0.999502	1.04173
RNF8	0.999849	-2.89733	0.999189	-2.51165	0.698227	-0.385682
RPA1	0.996211	1.85664	0.99924	-1.63366	0.999933	3.49029
RPA2	0.991558	1.03435	0.998245	1.74169	0.824108	-0.707337
RPA3	0.987015	1.31072	0.998878	1.97951	0.726088	-0.668794
SHPRH	0.999948	-2.60035	0.99952	-1.76507	0.996228	-0.835284
SLX4	0.999902	-3.60768	0.997784	-2.87447	0.800557	-0.733213
SMUG1	0.999322	2.43797	0.356231	0.39545	0.998069	2.04252
TDG	0.996193	-1.56461	0.999862	6.02035	0.999864	-7.58496
TDP1	0.998895	3.15265	0.878396	1.21853	0.977744	1.93411
TOPBP1	0.9998	-1.65111	0.798971	-0.536134	0.998192	-1.11498
TP53	0.827545	-0.518212	0.996464	1.7222	0.987405	-2.24041
TREX1	0.972622	1.47725	0.00754081	0.0531579	0.996691	1.42409
TREX2	0.802347	-1.22239	0.901853	1.848	0.999845	-3.07039
UBE2A	0.00375419	-0.12536	0.235643	0.368722	0.728942	-0.494083
UBE2B	0.998803	-1.6297	0.999093	-1.55387	0.162848	-0.0758207
UBE2N	0.928076	0.68494	0.999143	1.83474	0.986333	-1.14979
UNG	0.999884	3.55813	0.99923	2.02495	0.982483	1.53318
UVSSA	0.0754954	-0.191468	0.984216	-0.969075	0.974935	0.777608
WRN	0.971912	-0.987094	0.998183	-1.67279	0.963167	0.685691
XAB2	0.0465858	0.120982	0.00758903	0.0293078	0.202435	0.0916746
XPA	0.982752	1.21767	0.631681	0.560361	0.787589	0.657313
XPC	0.573565	0.264989	0.996554	0.793642	0.903875	-0.528653
XRCC3	0.995475	1.94865	0.994714	2.01049	0.0307206	-0.0618393
XRCC4	0.00772636	-0.184918	0.990677	-1.96253	0.995025	1.77761
XRCC5	1	2.97318	1	2.79051	0.407216	0.182668
XRCC6	0.0232252	-0.000347512	0.999965	2.37539	0.999936	-2.37573
