# Supplementary material for: DNA repair in species with extreme lifespan differences
Source: Aging (Albany NY). 2015 Dec 30;7(12):1171–82. doi: 10.18632/aging.100866 (PMC4712340; doi:10.18632/aging.100866)
Supplement: Supplementary file 4 [file aging-07-1171-s004.xlsx]

## Sheet: S3
Table S3. Essential DNA repair genes with higher expression in mouse than human and NMR liver
Gene symbol	Full gene name
EME2	essential meiotic endonuclease 1
ERCC6	excision repair cross-complementing rodent repair deficiency, complementation group 6
FANCM	Fanconi anemia, complementation group M
GTF2H5	general transcription factor IIH, polypeptide 5
RPA1	replication protein A1
XRCC4	X-ray repair complementing defective repair in Chinese hamster cells 4
Includes genes with probability of differential expression greater than 0.95 and fold change greater than two.
