# Supplementary material for: DNA repair in species with extreme lifespan differences
Source: Aging (Albany NY). 2015 Dec 30;7(12):1171–82. doi: 10.18632/aging.100866 (PMC4712340; doi:10.18632/aging.100866)
Supplement: Supplementary file 5 [file aging-07-1171-s005.xlsx]

## Sheet: S4
Table S4. Essential DNA repair genes having higher expression in NMR than mouse liver
Gene symbol	Full gene name
ATR	ataxia telangiectasia and Rad3 related; similar to ataxia telangiectasia and Rad3 related protein
ATRIP	ATR interacting protein
CHEK1	CHK1 checkpoint homolog (S. pombe)
DCLRE1C	DNA cross-link repair 1C (PSO2 homolog, S. cerevisiae)
DMC1	DMC1 dosage suppressor of mck1 homolog, meiosis-specific homologous recombination (yeast)
FANCD2	Fanconi anemia, complementation group D2
FANCG	Fanconi anemia, complementation group G
GTF2H2	general transcription factor IIH, polypeptide 2
HELQ	helicase, POLQ-like
HLTF	helicase-like transcription factor
MBD4	methyl-CpG binding domain protein 4
MLH3	mutL homolog 3 (E. coli)
MSH3	mutS homolog 3 (E. coli)
MSH4	mutS homolog 4 (E. coli)
MUTYH	mutY homolog (E. coli)
NEIL1	nei endonuclease VIII-like 1 (E. coli)
NEIL2	nei like 2 (E. coli)
NHEJ1	nonhomologous end-joining factor 1
PER1	period homolog 1 (Drosophila)
PMS2	PMS2 postmeiotic segregation increased 2 (S. cerevisiae)
POLD1	polymerase (DNA directed), delta 1, catalytic subunit 125kDa
POLK	polymerase (DNA directed) kappa
POLL	polymerase (DNA directed), lambda
POLQ	polymerase (DNA directed), theta
RAD17	RAD17 homolog (S. pombe)
RAD18	RAD18 homolog (S. cerevisiae)
RAD51D	RAD51 Paralog D
RFC5	replication factor C (activator 1) 5, 36.5kDa
TDG	similar to G/T mismatch-specific thymine DNA glycosylase; thymine-DNA glycosylase
TOPBP1	topoisomerase (DNA) II binding protein 1
TP53	tumor protein p53
TREX2	three prime repair exonuclease 2; HAUS augmin-like complex, subunit 7
UBE2N	ubiquitin-conjugating enzyme E2N (UBC13 homolog, yeast)
XRCC6	X-ray repair complementing defective repair in Chinese hamster cells 6; Ku70
Includes genes with probability of differential expression greater than 0.95 and fold change greater than two.
