# Supplementary material for: DNA repair in species with extreme lifespan differences
Source: Aging (Albany NY). 2015 Dec 30;7(12):1171–82. doi: 10.18632/aging.100866 (PMC4712340; doi:10.18632/aging.100866)
Supplement: Supplementary file 6 [file aging-07-1171-s006.xlsx]

## Sheet: S5
Table S5. Essential DNA repair genes with higher expression in human than mouse liver
Gene symbol	Full gene name
ALKBH2	alkB, alkylation repair homolog 2 (E. coli)
CCNH	cyclin H
CDKN1A	cyclin-dependent kinase inhibitor 1A (p21, Cip1)
FAN1	FANCD2/FANCI-Associated Nuclease 1
FANCC	Fanconi anemia, complementation group C
FANCL	Fanconi anemia, complementation group L
GEN1	Gen homolog 1, endonuclease (Drosophila)
GPS1	G protein pathway suppressor 1
MBD4	methyl-CpG binding domain protein 4
MGMT	O-6-methylguanine-DNA methyltransferase
MLH1	mutL homolog 1, colon cancer, nonpolyposis type 2 (E. coli)
MNAT1	menage a trois homolog 1, cyclin H assembly factor (Xenopus laevis)
MPG	N-methylpurine-DNA glycosylase
MSH3	mutS homolog 3 (E. coli)
MUTYH	mutY homolog (E. coli)
NEIL1	nei endonuclease VIII-like 1 (E. coli)
NEIL2	nei like 2 (E. coli)
NEIL3	nei endonuclease VIII-like 3 (E. coli)
NHEJ1	nonhomologous end-joining factor 1
NTHL1	nth endonuclease III-like 1 (E. coli)
POLE	polymerase (DNA directed), epsilon
POLK	polymerase (DNA directed) kappa
POLL	polymerase (DNA directed), lambda
POLM	polymerase (DNA directed), mu
RPA2	replication protein A2, 32kDa
RPA3	replication protein A3, 14kDa
TDG	similar to G/T mismatch-specific thymine DNA glycosylase; thymine-DNA glycosylase
TP53	tumor protein p53
UBE2N	ubiquitin-conjugating enzyme E2N (UBC13 homolog, yeast)
UNG	uracil-DNA glycosylase
XRCC3	X-ray repair complementing defective repair in Chinese hamster cells 3
XRCC5	X-ray repair complementing defective repair in Chinese hamster cells 5; Ku80
XRCC6	X-ray repair complementing defective repair in Chinese hamster cells 6; Ku70
Includes genes with probability of differential expression greater than 0.95 and fold change greater than two.
