# Supplementary material for: DNA repair in species with extreme lifespan differences
Source: Aging (Albany NY). 2015 Dec 30;7(12):1171–82. doi: 10.18632/aging.100866 (PMC4712340; doi:10.18632/aging.100866)
Supplement: Supplementary file 7 [file aging-07-1171-s007.xlsx]

## Sheet: S6
Table S6. Pathway activation scores for signaling pathways , human vs. mouse liver
Pathway	X.hs.hs1.	X.hs.hs2.	X.hs.hs3.	p-value_Mean
AHR Main Pathway	0.222126	0.108832	0.12807	0.0495346
AHR Pathway (C-myc expression via RELA)	0.386664	0.18957	0.225198	0.0495346
AHR Pathway (Cath D expression via SP1)	0.347575	0.18957	0.195969	0.0495346
AHR Pathway (CYP1A1 CYP1B1 CYP1A2 AHRR gene expression via POLR2B)	0	0	0	1
AHR Pathway (PS2 Gene expression via ESR1)	0.372402	0.203111	0.209966	0.0495346
Akt Signaling Main Pathway	-0.00797433	-0.0107408	0.000283684	0.512691
Akt Signaling Pathway (Acetylation of proteins)	-0.0506725	-0.0481647	-0.0281753	0.0495346
Akt Signaling Pathway (Aggregation and Neurodegeneration)	0.0422483	-0.00973986	0.0545253	0.512691
Akt Signaling Pathway (Apoptosis)	0.0500356	-0.0186646	0.0499647	0.512691
Akt Signaling Pathway (AR mediated apoptosis)	-0.160489	-0.200546	-0.15086	0.0495346
Akt Signaling Pathway (Blocks Apoptosis)	-0.100352	-0.149656	-0.121209	0.0495346
Akt Signaling Pathway (Blood cell differentiation)	-0.0110192	-0.0481647	-0.00299499	0.0495346
Akt Signaling Pathway (Cell Cycle)	0.961841	0.876677	0.961763	0.0495346
Akt Signaling Pathway (Cell Cycle Progression)	-0.264918	-0.279241	-0.241184	0.0495346
Akt Signaling Pathway (Cell Survival)	0.102441	0.0292651	0.105687	0.0495346
Akt Signaling Pathway (Elevation of Glucose Import)	-0.0110192	-0.0481647	-0.00299499	0.0495346
Akt Signaling Pathway (Enhancement of Breast Epithelial)	0.0161698	-0.0101658	0.0200578	0.512691
Akt Signaling Pathway (ERK mediated apoptosis)	-0.0110192	-0.0481647	-0.00299499	0.0495346
Akt Signaling Pathway (Genetic Stability)	-0.0110192	-0.0481647	-0.00299499	0.0495346
Akt Signaling Pathway (Glucose Uptake)	0.357779	0.368492	0.330355	0.0495346
Akt Signaling Pathway (Glycogen Synthesis and Apoptosis)	0.0515533	0.0245643	0.0643484	0.0495346
Akt Signaling Pathway (Increased GLUT4 translocation)	0.0149125	-0.000907166	0.0393182	0.512691
Akt Signaling Pathway (Induction of Chromatin Condensation)	-0.0110192	-0.0481647	-0.00299499	0.0495346
Akt Signaling Pathway (JNK mediated apoptosis)	0.041578	-0.0118785	0.0507426	0.512691
Akt Signaling Pathway (Neuroprotection)	0.0274657	-0.0433483	-0.00269549	0.512691
Akt Signaling Pathway (NF-kB dependent transciption)	0.112425	0.0216006	0.0914751	0.0495346
Akt Signaling Pathway (NF-kB pathway)	-0.26003	-0.268416	-0.281769	0.0495346
Akt Signaling Pathway (NFAT degradation)	-0.0275063	-0.0549212	-0.0126624	0.0495346
Akt Signaling Pathway (NO production)	-0.0110192	-0.0481647	-0.00299499	0.0495346
Akt Signaling Pathway (p73 mediated apoptosis)	0.0240668	-0.0185505	0.0394168	0.512691
Akt Signaling Pathway (Promotes Adipogenesis)	-0.0110192	-0.0481647	-0.00299499	0.0495346
Akt Signaling Pathway (Protein Synthesis)	-0.0744654	-0.150868	-0.122377	0.0495346
Akt Signaling Pathway (Proto-Oncogenic and RTK-signaling)	-0.0573878	-0.0824826	-0.0376569	0.0495346
Akt Signaling Pathway (Regulation of Cyclic Nucleotide)	-0.0110192	-0.0481647	-0.00299499	0.0495346
Akt Signaling Pathway (Regulation of Na+ Transport)	0.944412	0.838338	0.788338	0.0495346
Akt Signaling Pathway (Splicing Regulation)	0.450757	0.526323	0.518724	0.0495346
Akt Signaling Pathway (Survival Genes)	-0.0519135	-0.15553	-0.0636665	0.0495346
Akt Signaling Pathway (Synaptic Transmission)	-0.00619829	-0.0270927	-0.00168468	0.0495346
Akt Signaling Pathway (Translation)	-0.0879983	-0.167704	-0.195442	0.0495346
Akt Signaling Pathway (Tumor Supression)	-0.0110192	-0.0481647	-0.00299499	0.0495346
ATM Main Pathway	0.218835	0.23084	0.253887	0.0495346
ATM Pathway (Apoptosis)	-0.232477	-0.196169	0	0.19043
ATM Pathway (Apoptosis and Senescence)	0.21881	0.246105	0.103703	0.0495346
ATM Pathway (Cell Cycle Checkpoint Control)	0.350368	0.25867	0.298845	0.0495346
ATM Pathway (Cell Survival)	-0.0541258	-0.130279	0.00666162	0.512691
ATM Pathway (Checkpoint Activation)	0	0	0	1
ATM Pathway (DNA repair)	-0.115214	-0.117944	-0.148188	0.0495346
ATM Pathway (G2-Mitosis progression)	1.17656	1.27187	1.15597	0.0495346
ATM Pathway (G2 M Checkpoint Arrest)	1.17656	1.27187	1.15597	0.0495346
ATM Pathway (NF-kB Pathway)	-0.481211	-0.292363	-0.409571	0.0495346
ATM Pathway (Repair and Recombination)	-0.232477	-0.196169	0	0.19043
ATM Pathway (S-phase arrest)	0	0	0	1
ATM Pathway (S-phase progression)	-0.421966	-0.392692	-0.251637	0.0495346
ATM Pathway (Synaptic Vesicle Transport)	0	0	0	1
BRCA1 Main Pathway	0.140905	0.0713998	0.125009	0.0495346
BRCA1 Pathway (Base Excission Repair)	0.840143	0.789405	0.647518	0.0495346
BRCA1 Pathway (Cell Cycle Arrest DNA Repair Genes p21 WAF CIP1 14-3-3 GADD45)	0.200362	0.131741	-0.114597	0.512691
BRCA1 Pathway (Chromatin Remodeling)	0.16706	0.0849267	0.170921	0.0495346
BRCA1 Pathway (E2 Responsive Genes)	0.0924758	0.048222	0.0878897	0.0495346
BRCA1 Pathway (G1 S arrest)	0.930803	0.685729	0.719734	0.0495346
BRCA1 Pathway (Growth Promoting Genes hTert S100A7)	-0.127853	-0.237417	-0.270151	0.0495346
BRCA1 Pathway (Homologous Recombination Repair)	-0.305237	-0.3806	-0.329013	0.0495346
BRCA1 Pathway (Mismatch Repair)	0.259009	0.205346	0.139997	0.0495346
BRCA1 Pathway (NHEJ DSB Repair)	-0.0730591	-0.135667	-0.154372	0.0495346
BRCA1 Pathway (Nucleotide Excission Repair)	0.468993	0.506328	0.290534	0.0495346
BRCA1 Pathway (Transciption Coupled Repair)	-0.127853	-0.237417	-0.270151	0.0495346
cAMP Main Pathway	-0.0535599	-0.0501458	-0.042202	0.0495346
cAMP Pathway (Axonal Growth)	0.215093	0.0295128	0.0823738	0.0495346
cAMP Pathway (Cell Growth)	0.0531022	0.0772835	0.0862769	0.0495346
cAMP Pathway (Cell Proliferation)	0.0777988	-0.0286986	-0.00612412	0.512691
cAMP Pathway (Cell Survival)	0.0522793	0.0185749	0.0306185	0.0495346
cAMP Pathway (Chemotaxis)	0.0395017	0.059129	0.0617314	0.0495346
cAMP Pathway (Cytokine Production)	0.0382388	0.0454302	0.0632414	0.0495346
cAMP Pathway (Degradation of Cell Cycle Regulators)	0.184054	0.187483	0.218419	0.0495346
cAMP Pathway (Endothelial Cell Regulation)	-0.214062	-0.143441	-0.148029	0.0495346
cAMP Pathway (eNOS Signaling Cardiovascular Homeostasis)	0.0777988	-0.0286986	-0.00612412	0.512691
cAMP Pathway (Fatty Acid Metabolism)	0.0233155	0.051151	0.0467412	0.0495346
cAMP Pathway (Gene Expression via NFKB2 CREBBP ELK1)	0.306438	0.133769	0.175051	0.0495346
cAMP Pathway (Glycogen Synthesis)	0.0718143	-0.026491	-0.00565304	0.512691
cAMP Pathway (Glycolisis)	-0.306222	-0.235116	-0.311799	0.0495346
cAMP Pathway (Lipolysis)	-0.233043	-0.281778	-0.288926	0.0495346
cAMP Pathway (Metabolic Energy)	0.0285035	0.0410842	0.106724	0.0495346
cAMP Pathway (Myocardial Contraction)	-0.0982452	-0.140551	-0.1332	0.0495346
cAMP Pathway (Oncogenesis)	0.162419	0.0761003	0.0925415	0.0495346
cAMP Pathway (Protein Retention)	0.210272	0.159675	0.234431	0.0495346
cAMP Pathway (Regulation of Cytoskeleton)	-0.0200522	-0.109034	-0.115195	0.0495346
Caspase Cascade Main Pathway	0.0410287	0.0463805	0.0336428	0.0495346
Caspase Cascade Pathway (Activated Tissue Trans-glutaminase)	-0.12116	-0.0565985	-0.0753073	0.0495346
Caspase Cascade Pathway (DNA Fragmentation)	-0.291896	-0.304621	-0.297652	0.0495346
CD40 Main Pathway	-0.0871513	-0.275297	-0.247187	0.0495346
CD40 Pathway (Cell Survival)	0.347473	0.168305	0.0268949	0.275234
CD40 Pathway (Gene Expression Cell Adhesion Molecule via NFKB2)	-0.0632777	-0.330944	-0.306091	0.0495346
CD40 Pathway (Gene Expression Cell Survival via NFKB2)	-0.0632777	-0.330944	-0.306091	0.0495346
CD40 Pathway (Gene Expression Co-Stimulatory Molecules via NFKB2)	-0.0632777	-0.330944	-0.306091	0.0495346
CD40 Pathway (Gene Expression COX2 and Prostaglandins via NFKB2)	-0.0632777	-0.330944	-0.306091	0.0495346
CD40 Pathway (Gene Expression Immunoglobulin Class Switch via NFKB2)	-0.0632777	-0.330944	-0.306091	0.0495346
CD40 Pathway (Gene Expression Pro-Inflamatory Cytokines via NFKB2)	-0.0632777	-0.330944	-0.306091	0.0495346
CD40 Pathway (Gene Expression Procoagulant Activity via NFKB2)	-0.0632777	-0.330944	-0.306091	0.0495346
Cellular Apoptosis Main Pathway	0.0487116	0.0113081	0.0220132	0.0495346
Cellular Apoptosis Pathway (Depolarization)	0.0741101	0.128309	-0.157988	0.512691
Cellular Apoptosis Pathway (DNA Fragmentation)	-0.0650611	-0.0673181	-0.0423484	0.0495346
Cellular Apoptosis Pathway (Gene Expression BAX BID BAK Ras Noxa PUMA APAF1 Survivin BCL2 via TP53)	0.0592881	0.102647	-0.12639	0.512691
Cellular Apoptosis Pathway (Gene Expression FLIP CIAP2 BFL1 BCL2 via NFKB2)	-0.0685508	-0.358522	-0.331599	0.0495346
Chemokine Main Pathway	0.0453463	0.0490237	0.0634317	0.0495346
Chemokine Pathway (Cell Activation)	-0.117722	-0.119323	-0.100302	0.0495346
Chemokine Pathway (Gene Expression and Apoptosis via ELK1)	-0.058715	-0.106862	0.00328052	0.512691
Chemokine Pathway (Internalization Degradation Recycling)	-0.321516	-0.310112	-0.255438	0.0495346
Chromatin Main Pathway	0.569579	0.581561	0.612612	0.0495346
Circadian Main Pathway	-0.246065	-0.303776	-0.184916	0.0495346
CREB Main Pathway	-0.0463643	-0.0284333	-0.0214974	0.0495346
Cytokine Network Main Pathway	-0.0418343	-0.0847059	-0.0782718	0.0495346
EGF Main Pathway	0.166765	0.187554	0.200511	0.0495346
EGF Pathway (Actin Cytoskeletal Rearrangement)	0.619309	0.633645	0.62385	0.0495346
EGF Pathway (Cell Motility)	0.832346	1.02951	1.01729	0.0495346
EGF Pathway (Cell Survival)	-0.0263994	0.0205624	0.0279054	0.512691
EGF Pathway (Cytoskeleton Regulation)	0.518585	0.586519	0.58607	0.0495346
EGF Pathway (EGFR Endocytosis)	0.832346	0.921112	0.912065	0.0495346
EGF Pathway (Gene Expression via FOS NFKB2 MYC STAT1 ELK1 STAT3 JUN)	0.10744	0.0676711	0.0669166	0.0495346
EGF Pathway (IP3 Signaling)	0.349945	0.524734	0.66316	0.0495346
EGF Pathway (Rab5 Regulation Pathway)	0.716866	0.660125	0.741085	0.0495346
ErbB Family Main Pathway	0.0587773	0.055337	0.0797338	0.0495346
ErbB Family Pathway (Anti-Apoptosis)	0.562799	0.609791	0.566899	0.0495346
ErbB Family Pathway (Gene Expression via JUN FOS ELK1)	0.00366566	0.0423233	0.0806935	0.0495346
ErbB Family Pathway (Translation)	0.135637	0.0719684	-0.0705555	0.512691
ERK Signaling Main Pathway	-0.0265509	-0.0137832	0.000294277	0.275234
ERK Signaling Pathway (Cell Survival)	0.354956	0.226246	0.303533	0.0495346
ERK Signaling Pathway (EGFR signaling)	-0.431906	-0.606076	-0.520184	0.0495346
ERK Signaling Pathway (Gene Expression via CAPN6 TP53 FOS ATF1 MYC ELK3 MYLK ETS1 SRF HIST1H3B CREB3 STAT3 NFKB2 HMGN1 ESR2 ELK1 PAX6 JUN)	0.213264	0.162287	0.193346	0.0495346
ERK Signaling Pathway (Translation)	-0.316731	-0.444456	-0.409746	0.0495346
Erythropoietin Main Pathway	0.142923	0.0948706	0.139486	0.0495346
Erythropoietin Pathway (Anti-Apoptosis)	0.395907	0.261295	0.383487	0.0495346
Erythropoietin Pathway (BCLXL Gene Expression via STAT5B)	-0.642364	-0.636491	-0.556028	0.0495346
Erythropoietin Pathway (Cell Cycle Progression)	0.0427528	-0.069904	-0.00254925	0.512691
Erythropoietin Pathway (Cell Survival)	0.13821	0.104094	0.107081	0.0495346
Erythropoietin Pathway (Gene Expression Neuroprotection via NFKB2)	0.562662	0.32555	0.356008	0.0495346
Erythropoietin Pathway (GPI Hidrolysis and Ca2+ influx)	-0.218105	-0.0712735	0.0420042	0.512691
Estrogen Main Pathway	-0.0173992	-0.0181842	-0.0149995	0.0495346
Estrogen Pathway (Anti-Apoptosis)	0.0270838	-0.0443679	-0.00309705	0.512691
Estrogen Pathway (Gene Expression via FOS JUN ELK1 SP1 POLR2B CREB3 NFKB2)	0.063023	0.0061669	0.0337739	0.12663
Estrogen Pathway (Vasodilatation)	0	0	0	1
FLT3 Signaling Main Pathway	0.122936	0.068734	0.108967	0.0495346
FLT3 Signaling Pathway (Transcription via ELK3 MAPK12 CREB3 STAT2)	0.0509393	-0.0491097	0.0120649	0.512691
FLT3 Signaling Pathway (Translation)	0.463824	0.529189	0.576021	0.0495346
Glucocorticoid Receptor Signaling Main Pathway	-0.153022	-0.129621	-0.14371	0.0495346
Glucocorticoid Receptor Signaling Pathway (Cell Cycle Arrest)	-0.344937	-0.307711	-0.329244	0.0495346
Glucocorticoid Receptor Signaling Pathway (Cell Cycle Progression)	0.332167	0.375197	0.330139	0.0495346
Glucocorticoid Receptor Signaling Pathway (Gene Expression via CREB3 STAT5B SLC22A2 POU2F1)	0.269441	0.24071	0.255574	0.0495346
Glucocorticoid Receptor Signaling Pathway (Histone Deacetylation)	-0.207806	-0.25292	-0.23067	0.0495346
Glucocorticoid Receptor Signaling Pathway (Inflammatory Cytokines)	-0.181639	-0.145714	-0.172855	0.0495346
GPCR Main Pathway	-0.0239815	-0.0372866	-0.0106946	0.12663
GPCR Pathway (Gene Expression via JUN NFKB2 ELK1 SRF FOS CREB3)	0.257227	0.202519	0.241683	0.0495346
Growth Hormone Signaling Main Pathway	-0.182262	-0.168354	-0.153138	0.0495346
Growth Hormone Signaling Pathway (Cell Survival)	-0.338988	-0.262163	-0.365547	0.0495346
Growth Hormone Signaling Pathway (Gene Expression via SRF ELK1 STAT5B CEBPD STAT1 STAT3)	-0.126632	-0.132242	-0.082877	0.0495346
Growth Hormone Signaling Pathway (Glucose Uptake)	-0.117674	-0.1045	-0.108001	0.0495346
Growth Hormone Signaling Pathway (Protein Synthesis)	-0.96074	-0.5848	-1.06187	0.0495346
GSK3 Signaling Main Pathway	-0.00697279	-0.0304216	-0.0170591	0.0495346
GSK3 Signaling Pathway (b-CTNN Degradation)	-0.0213442	0.00856929	0.0100976	0.512691
GSK3 Signaling Pathway (Gene Expression via CTNNB1)	-0.121263	-0.116838	-0.100963	0.0495346
GSK3 Signaling Pathway (Glycogen Synthesis)	-0.209783	-0.215191	-0.197717	0.0495346
GSK3 Signaling Pathway (Protein Synthesis)	-0.23901	-0.224092	-0.217739	0.0495346
Hedgehog Signaling in Mammals Main Pathway	-0.000505294	0.0338809	0.00983752	0.275234
HGF Main Pathway	-0.103631	-0.0565428	-0.011027	0.0495346
HGF Pathway (Anoikis)	0.298731	0.400417	0.412762	0.0495346
HGF Pathway (Cell Adhesion and Cell Migration)	-0.329655	-0.280332	-0.207014	0.0495346
HGF Pathway (Cell Cycle Progression)	0.520655	0.72289	0.744045	0.0495346
HGF Pathway (Cell Scattering)	0.0381083	0.0499753	0.0507679	0.0495346
HGF Pathway (Cell Survival)	0.0381083	0.0499753	0.0507679	0.0495346
HGF Pathway (Gene Expression via JUN STAT3 FOS ELK1 ETS2)	0.23746	0.395295	0.408493	0.0495346
HGF Pathway (IP3 Pathway)	-0.218105	-0.0712735	0.0420042	0.512691
HGF Pathway (PKC Pathway)	-0.145403	-0.0475157	0.0280028	0.512691
HGF Pathway (Regulation of Cytoskeleton Cell Polarity and Cell Motility)	-0.226401	-0.331704	-0.302654	0.0495346
HIF1Alpha Main Pathway	-0.0133719	-0.00241093	0.0195362	0.512691
HIF1Alpha Pathway (Gene Expression via JUN CREB3)	-0.0696153	-0.0651761	-0.0110408	0.0495346
HIF1Alpha Pathway (HIF1a Degradation)	0	0	0	1
HIF1Alpha Pathway (NOS Pathway)	-0.114682	-0.090926	-0.0654149	0.0495346
HIF1Alpha Pathway (p53 Hypoxia Pathway)	-0.0333759	-0.00890031	-0.010612	0.0495346
HIF1Alpha Pathway (VEGF Pathway)	-0.114682	-0.090926	-0.0654149	0.0495346
IGF1R Signaling Main Pathway	0.0300691	-0.0156128	0.0313814	0.512691
IGF1R Signaling Pathway (Apoptosis)	0.190189	0.124772	0.145462	0.0495346
IGF1R Signaling Pathway (Cell Migration)	-0.342024	-0.268549	-0.24533	0.0495346
IGF1R Signaling Pathway (Cell Proliferation Diferentiation and Apoptosis)	-0.141148	-0.254623	-0.168118	0.0495346
IGF1R Signaling Pathway (Cell Survival)	0.414347	0.318412	0.432811	0.0495346
IGF1R Signaling Pathway (Gene Expression Proliferation Growth Survival via NFAT5 CREB3)	0.18096	0.0612708	0.106915	0.0495346
IGF1R Signaling Pathway (Glucose Uptake)	-0.643203	-0.528504	-0.331872	0.0495346
IGF1R Signaling Pathway (Glycogen Synthesis)	0.496815	0.573163	0.558571	0.0495346
IGF1R Signaling Pathway (Protein Synthesis)	0.216764	0.136455	0.238312	0.0495346
IL-10 Main Pathway	0.338473	0.267236	0.300829	0.0495346
IL-10 Pathway (IL-10 Responsive Genes Transcription of BCLXL Cyclin-D1 D2 D3 Pim1 c-Myc and P19(INK4D) via STAT3)	-0.102289	-0.0948582	-0.0830316	0.0495346
IL-10 Pathway (Inflammatory Cytokine Genes Expression via STAT3)	-0.102289	-0.0948582	-0.0830316	0.0495346
IL-10 Pathway (Stability Determination)	1.80624	1.85219	1.97405	0.0495346
IL-10 Pathway (Translational Modulation)	0.691794	0.703071	0.748128	0.0495346
IL-2 Main Pathway	0.255314	0.227195	0.252132	0.0495346
IL-2 Pathway (Actin Reorganization)	1.16239	1.0715	1.17382	0.0495346
IL-2 Pathway (Apoptosis)	0	0	0	1
IL-2 Pathway (Apoptosis Inhibition)	0.0934159	0.048105	0.0490166	0.0495346
IL-2 Pathway (Gene Expression via FYN LYN RPS6KB1 PTK2B)	-0.0645648	-0.0750677	-0.0890695	0.0495346
IL-2 Pathway (IL2 Gene Expression via POLR1E EGR1 HMGA1 ELF1 POU2F1 MYC)	0.52133	0.500945	0.522215	0.0495346
IL-2 Pathway (Protein Synthesis)	-0.193382	-0.249654	-0.302734	0.0495346
IL-6 Main Pathway	-0.0165724	-0.0524259	-0.0154581	0.0495346
ILK Signaling Main Pathway	-0.0514429	-0.0288326	-0.0189371	0.0495346
ILK Signaling Pathway (Actin Polymerization Cytoskeletal Reorganization)	-0.0143795	-0.087002	-0.0602865	0.0495346
ILK Signaling Pathway (Apoptosis)	0.362752	0.329537	0.378522	0.0495346
ILK Signaling Pathway (Cell Adhesion)	0	0	0	1
ILK Signaling Pathway (Cell Cycle Proliferation)	-0.268687	-0.24128	-0.191485	0.0495346
ILK Signaling Pathway (Cell Migration Retraction)	-0.239959	-0.208751	-0.16035	0.0495346
ILK Signaling Pathway (Cell Motility)	0.0185935	-0.0415079	-0.0193985	0.512691
ILK Signaling Pathway (Cytoskeletal Adhesion Complexes)	-0.14545	-0.10548	-0.0704966	0.0495346
ILK Signaling Pathway (Epithelial Mesenchymal Transition)	-0.0528125	-0.0651742	-0.0418534	0.0495346
ILK Signaling Pathway (Epithelial Mesenchymal Transition Tubulo-Interstitial Fibrosis)	-0.131411	-0.0934166	-0.0597036	0.0495346
ILK Signaling Pathway (G2 Phase Arrest)	-0.268687	-0.24128	-0.191485	0.0495346
ILK Signaling Pathway (Induced Cell Proliferation)	-0.104682	-0.356669	-0.169894	0.0495346
ILK Signaling Pathway (Loss of Occludin Barrier Dysfunction)	-0.36217	-0.337968	-0.267773	0.0495346
ILK Signaling Pathway (Migration Vasculogenesis)	-0.131411	-0.0934166	-0.0597036	0.0495346
ILK Signaling Pathway (MMP2 MMP9 Gene Expression Tissue Invasion via FOS)	0.824401	1.01949	0.98801	0.0495346
ILK Signaling Pathway (Opsonization)	0.176864	0.176864	0.176864	0.0495346
ILK Signaling Pathway (Regulation of Intermediate Filaments)	0	0	0	1
ILK Signaling Pathway (Regulation of Junction Assembly at Desmosomes)	0	0	0	1
ILK Signaling Pathway (Tissue Morphogenesis)	0.824401	1.01949	0.98801	0.0495346
ILK Signaling Pathway (Tumor Angiogenesis)	0	0	0	1
ILK Signaling Pathway (Wound Healing)	0	0	0	1
Interferon Main Pathway	-0.0681933	-0.0891368	-0.0770932	0.0495346
Interferon Pathway (Gene Expression via HIST1H3B CREB3)	0.0182064	-0.104298	-0.0238037	0.512691
Interferon Pathway (Transciption)	-0.0740438	-0.0750875	-0.11458	0.0495346
Interferon Pathway (Translation)	0.582761	0.434169	0.336122	0.0495346
IP3 Main Pathway	0.0282546	0.0143843	0.0483478	0.12663
IP3 Pathway (Gene Expression via CREB3 NFATC2 MEF2D)	0.219353	0.135271	0.164893	0.0495346
JAK-STAT Main Pathway	0.0325532	0.0207367	0.035292	0.0495346
JAK-STAT Pathway (Akt Pathway)	-0.119359	-0.126898	-0.152341	0.0495346
JAK-STAT Pathway (Gene Expression via MYC)	-0.679665	-0.852237	-0.894054	0.0495346
JAK-STAT Pathway (IFN-Inducible Gene Expression via STAT2 STAT1)	0.0217321	0.0296215	0.0179994	0.0495346
JAK-STAT Pathway (JAK Degradation)	0.0213442	-0.00856929	-0.0100976	0.512691
JAK-STAT Pathway (Nml SOCS BCL-XL p21 Myc Nos2 Gene Expression via STAT2)	0.000539158	-0.00523445	0.0101847	0.827259
JNK Main Pathway	-0.00338609	0.000661591	0.0150738	0.827259
JNK Pathway (Gene Expression Apoptosis Inflammation Tumorigenesis Cell Migration via SMAD4 STAT4 HSF1 TP53 MAP2 DCX ATF2 NFATC3 SPIRE1 MAP1B TCF15 ELK1 BCL2 JUN PXN NFATC2)	-0.0939436	-0.0632123	-0.0857706	0.0495346
JNK Pathway (Insulin Signaling)	-0.438433	-0.496576	-0.515725	0.0495346
MAPK Family Main Pathway	0.0749579	0.0496123	0.0705129	0.0495346
MAPK Family Pathway (Chromatin Remodelling)	0.159639	0.129804	0.132998	0.0495346
MAPK Family Pathway (Cytoskeleton)	0.38575	0.337535	0.494163	0.0495346
MAPK Family Pathway (Gene Expression via ATF2 JUN ELK1 NFKB2 CREB3)	0.00708257	-0.145178	-0.0691479	0.512691
MAPK Family Pathway (Translation)	-0.126669	-0.27194	-0.287808	0.0495346
MAPK Signaling Main Pathway	-0.0634196	-0.0453049	-0.029077	0.0495346
MAPK Signaling Pathway (Cell Motility Inflammation Apoptosis Osmoregulation)	-0.130265	-0.295825	-0.146566	0.0495346
MAPK Signaling Pathway (Cell Survival)	0	0	0	1
MAPK Signaling Pathway (Gene Expression Apoptosis Inflammation Tumorigenesis via MYC HSF1 STAT2)	-0.0914481	-0.068394	-0.0566928	0.0495346
MAPK Signaling Pathway (Gene Expression Cell Proliferation Cell Survival Tumorigenesis Differentiation Development via PXN CREB3 RPS6KA5 RPS6KA6)	-0.202586	-0.257282	-0.151656	0.0495346
Mismatch Repair in Eukaryotes Main Pathway	0.387726	0.366458	0.347322	0.0495346
Mitochondrial Apoptosis Main Pathway	-0.0678224	-0.0418751	-0.054364	0.0495346
Mitochondrial Apoptosis Pathway (Apoptosis)	0.0131165	0.0288967	0.0517343	0.12663
Mitochondrial Apoptosis Pathway (Depolarization)	-0.0998171	-0.18457	-0.265615	0.0495346
Mitochondrial Apoptosis Pathway (DNA Fragmentation)	-0.0105504	-0.0103257	0.0176	0.827259
Mitochondrial Apoptosis Pathway (Gene Expression via TP53)	-0.116453	-0.215331	-0.309884	0.0495346
mTOR Main Pathway	0.035629	0.0320443	0.0365398	0.0495346
mTOR Pathway (Actin Organization)	-0.219025	-0.163581	-0.116426	0.0495346
mTOR Pathway (Autophagy)	1.51817	1.1456	1.39378	0.0495346
mTOR Pathway (Cap-dependent Translation)	-0.288747	-0.39466	-0.461698	0.0495346
mTOR Pathway (Inflammation Stress Resistance)	0.533657	0.314642	0.32028	0.0495346
mTOR Pathway (Lipid Synthesis)	-0.259749	-0.197964	-0.158869	0.0495346
mTOR Pathway (Metabolism Stress Response and Apoptosis)	0.372681	0.324619	0.279313	0.0495346
mTOR Pathway (Microtubule Organization)	-0.264844	-0.201637	-0.157418	0.0495346
mTOR Pathway (Mitochondria Proliferation and Function)	0.858258	0.8003	0.675025	0.0495346
mTOR Pathway (mRNA Biogenesis)	-0.222142	-0.296524	-0.400911	0.0495346
mTOR Pathway (Ribosome Biogenesis)	1.51912	1.47952	1.39049	0.0495346
mTOR Pathway (Translation Elongation)	0.0292794	-0.0326851	-0.0109355	0.512691
mTOR Pathway (VEGF Pathway)	0	0	0	1
NGF Main Pathway	0.0383707	-0.00172612	0.0109303	0.275234
NGF Pathway (Actin Polymerization Neurite Outgrowth and Differentiation)	0.164265	0.184128	0.172176	0.0495346
NGF Pathway (Apoptosis)	-0.035425	0.00866592	-0.0637662	0.512691
NGF Pathway (Gene Expression via MYC ELK1 CREB3 NFKB2)	0.315832	0.115251	0.232674	0.0495346
NGF Pathway (Neurite Outgrowth and Differentiation)	-0.118831	-0.0814947	-0.0948102	0.0495346
NGF Pathway (Neuronal Survival)	-0.0620237	-0.0303315	-0.00647061	0.0495346
Notch Signaling Main Pathway	0.159866	0.222739	0.183311	0.0495346
Notch Signaling Pathway (gamma Secretase)	0.154104	0.145947	0.204274	0.0495346
Notch Signaling Pathway (Gene Expression Chromatin Remodeling via RBPJ)	0.161146	0.239804	0.178653	0.0495346
Notch Signaling Pathway (Transcription of Target Genes Hairy E-SpI via RBPJ)	0.161146	0.239804	0.178653	0.0495346
p38 Signaling Main Pathway	0.0490624	0.0432427	0.0529602	0.0495346
p38 Signaling Pathway (Actin Cytoskeleton Reorganiztion)	0.739918	0.824961	0.978464	0.0495346
p38 Signaling Pathway (Apoptosis)	0	0	0	1
p38 Signaling Pathway (Gene Expression Cell Motility Inflammation Apoptosis Osmoregulation via MEF2D TP53 CREB1 ATF2 JUND ETV1 NFKB2 AP2A1 MAX FOSL1 CEBPG ELK1 CDC25C JUNB STAT1 SP1 DDIT3 ELK4 CEBPA)	0.354025	0.261145	0.252587	0.0495346
p38 Signaling Pathway (Translation)	0	0	0	1
p53 Signaling Main Pathway	-0.0576889	-0.0458021	-0.0524917	0.0495346
p53 Signaling Pathway (Apoptosis)	-0.171804	-0.169569	-0.196773	0.0495346
p53 Signaling Pathway (Breast Cancer)	-0.199206	-0.202902	-0.242042	0.0495346
p53 Signaling Pathway (Cancer)	-0.171804	-0.169569	-0.196773	0.0495346
p53 Signaling Pathway (Cell Cycle Arrest)	-0.199206	-0.202902	-0.242042	0.0495346
p53 Signaling Pathway (Cell Growth Accumulation)	-0.199206	-0.202902	-0.242042	0.0495346
p53 Signaling Pathway (DNA Repair)	-0.199206	-0.202902	-0.242042	0.0495346
p53 Signaling Pathway (Exosome Mediated Secretion)	-0.199206	-0.202902	-0.242042	0.0495346
p53 Signaling Pathway (Gene Expression Anti-Apoptosis via TP53)	-0.171804	-0.169569	-0.196773	0.0495346
p53 Signaling Pathway (Gene Expression Cell Cycle and Cell Growth via TP53)	-0.171804	-0.169569	-0.196773	0.0495346
p53 Signaling Pathway (Gene Expression Cell Fate and Development via TP53)	-0.171804	-0.169569	-0.196773	0.0495346
p53 Signaling Pathway (Gene Expression Cell Signaling via TP53)	-0.171804	-0.169569	-0.196773	0.0495346
p53 Signaling Pathway (Gene Expression DNA Replication and Repair via TP53)	-0.171804	-0.169569	-0.196773	0.0495346
p53 Signaling Pathway (Gene Expression ECM and Adhesion via TP53)	-0.171804	-0.169569	-0.196773	0.0495346
p53 Signaling Pathway (Gene Expression Infection and Immune Response via TP53)	-0.171804	-0.169569	-0.196773	0.0495346
p53 Signaling Pathway (Inhibition of Angiogenesis and Metastasis)	-0.199206	-0.202902	-0.242042	0.0495346
p53 Signaling Pathway (Inhibition of IGF1R mTOR Pathways)	1.31286	1.47663	0.622217	0.0495346
p53 Signaling Pathway (Normal Cell Cycle Progression)	-0.171804	-0.169569	-0.196773	0.0495346
PAK Main Pathway	0.0425445	0.0595135	0.0529958	0.0495346
PAK Pathway (Actin Organization)	0.0470525	0.0506475	0.032025	0.0495346
PAK Pathway (Cell Survival)	0.0470525	0.0506475	0.032025	0.0495346
PAK Pathway (Contractility Stress Fibres and Focal Adhesion)	0.104173	0.145319	0.126632	0.0495346
PAK Pathway (Lamelliopodia and Filopodia Outgrowth)	0.0807547	0.078906	0.0651172	0.0495346
PAK Pathway (Paxillin Disassembly)	0	0	0	1
PAK Pathway (Transciptional Activation and Filopodia Formation)	-0.582695	-0.556603	-0.364583	0.0495346
PPAR Main Pathway	-0.023696	-0.00852814	0.00477559	0.512691
PPAR Pathway (Adipocyte Differentiation Glucose Homeostasis and Macrophage Function)	0.543855	0.64024	0.449371	0.0495346
PPAR Pathway (Fatty Acid Metabolism Lipid Homeostasis and Skin Proliferation)	0.543855	0.64024	0.449371	0.0495346
PPAR Pathway (Peroxisome Proliferation Hepatocarcinogenesis Fatty Acid Metbolism and Lipid Homeostasis)	0.543855	0.64024	0.449371	0.0495346
PTEN Main Pathway	0.0313599	0.0373946	0.0274529	0.0495346
PTEN Pathway (Adhesion or Migration)	0.0776681	0.0667499	0.0752767	0.0495346
PTEN Pathway (Angiogenesis and Tumorigenesis)	0.0297099	0.0366854	0.0469311	0.0495346
PTEN Pathway (Apoptosis)	-0.541968	-0.379388	-0.482134	0.0495346
PTEN Pathway (Ca2+ Signaling)	0.0297099	0.0366854	0.0469311	0.0495346
PTEN Pathway (Cell Cycle)	0.124089	0.10226	0.10155	0.0495346
PTEN Pathway (Cell Survival)	-0.318377	-0.294243	-0.334004	0.0495346
PTEN Pathway (Differentiation)	0.129106	0.107676	0.106671	0.0495346
PTEN Pathway (DNA Repair)	0.178024	0.154421	0.150774	0.0495346
PTEN Pathway (Genomic Stability)	0.184459	0.160002	0.156224	0.0495346
PTEN Pathway (Growth)	0.124089	0.10226	0.10155	0.0495346
PTEN Pathway (Migration)	0.100318	0.07556	0.0576958	0.0495346
PTEN Pathway (Neuronal Survival)	0.127405	0.342737	0.183298	0.0495346
PTEN Pathway (Proliferation)	0.139832	0.104723	0.0934659	0.0495346
PTEN Pathway (Proliferation CyclinA2 Geminin AuroraA PLK1)	-0.10819	-0.145872	-0.156317	0.0495346
PTEN Pathway (Protein Synthesis)	0.333214	0.444785	0.601366	0.0495346
PTEN Pathway (Senescence Ets2 p16)	-0.10819	-0.145872	-0.156317	0.0495346
PTEN Pathway (Synaptic Transmission)	0.180118	0.156238	0.152548	0.0495346
RANK Signaling in Osteoclasts Main Pathway	0.0669378	0.0272914	0.0768537	0.0495346
RANK Signaling in Osteoclasts Pathway (Expression of Osteoclastic Genes via JUN NFAT5 NFKB2 MITF FOS)	0.0398414	-0.0255966	0.0297002	0.275234
RANK Signaling in Osteoclasts Pathway (Inhibition of Death)	0.107165	-0.0428833	-0.0222106	0.512691
RANK Signaling in Osteoclasts Pathway (Resorption)	0.137337	0.0180473	0.0656129	0.0495346
Ras Main Pathway	-0.0651989	-0.0602512	-0.0449428	0.0495346
Ras Pathway (Apoptosis)	0.0176333	-0.143941	-0.104717	0.512691
Ras Pathway (CDC42 Pathway)	-0.422277	-0.233164	-0.0847343	0.0495346
Ras Pathway (Cell-Cell Junctions)	-0.139887	-0.185898	-0.138487	0.0495346
Ras Pathway (Gene Expression Cell Proliferation Cell Survival Differentiation Development Cell Cycle Control Cell Motility Tumorigenesis via ELK4 ATF2 MEF2D STAT2 CREB3 CCNA1 MYC ELK1 JUN CDK4)	-0.0217753	-0.0279737	-0.00673305	0.0495346
Ras Pathway (Golgi Trafficking and Vesicle Formation)	0.255784	0.436735	0.331989	0.0495346
Ras Pathway (Increased T-cell Adhesion)	-0.490331	-0.457201	-0.385137	0.0495346
Ras Pathway (Receptor Endocytosis)	-0.252189	-0.418139	-0.35401	0.0495346
Ras Pathway (RhoA Pathway)	-0.0561945	-0.0532488	0	0.19043
SMAD Signaling Network Main Pathway	0.240912	0.265798	0.282214	0.0495346
STAT3 Main Pathway	0.0976646	0.0836702	0.10427	0.0495346
STAT3 Pathway (Anti-Apoptosis)	0	-0.139792	-0.177929	0.19043
STAT3 Pathway (G1 to S Cell Cycle Progression)	-0.843932	-0.979087	-0.538502	0.0495346
STAT3 Pathway (Growth Arrest and Differentiation)	0.169795	0.154653	0.18321	0.0495346
TGF-Beta Main Pathway	0.0731053	0.0706373	0.0770501	0.0495346
TGF-Beta Pathway (Epithelial Mesenchymal Transdifferentiation)	-0.061205	-0.0659574	-0.0672627	0.0495346
TGF-Beta Pathway (Post Transciptional G1 Arrest)	-0.127411	-0.105663	-0.143037	0.0495346
TGF-Beta Pathway (Transciption Arrested Growth Apoptosis)	0.0674345	0.109294	0.188496	0.0495346
TGF-Beta Pathway (Transciption Cell Growth and Mobility and Angiogenesis)	0.0674345	0.109294	0.188496	0.0495346
TNF Signaling Main Pathway	0.19364	0.139349	0.176123	0.0495346
TNF Signaling Pathway (Apoptosis)	-0.0655774	-0.0213936	-0.0220893	0.0495346
TNF Signaling Pathway (Gene Expression and Cell Survival via FOS NFKB2 JUN ELK1 ATF6)	0.222871	0.17921	0.218867	0.0495346
TRAF Main Pathway	0.116147	0.078415	0.0672337	0.0495346
TRAF Pathway (Apoptosis)	0.152558	0.146502	0.146798	0.0495346
TRAF Pathway (Cell Survival)	-0.170125	-0.2053	-0.197039	0.0495346
TRAF Pathway (Direct Antimicrobial Response and Cell-Mediated Immunity and Apoptosis of Host Cell)	0.703328	0.406937	0.44501	0.0495346
TRAF Pathway (Gene Expression via FOS JUN)	0.316905	0.510103	0.512607	0.0495346
Ubiquitin-Proteasome Dependent Proteolysis Main Pathway	-0.0965708	-0.126011	-0.10815	0.0495346
VEGF Main Pathway	0.100696	0.0724951	0.120102	0.0495346
VEGF Pathway (Actin Reorganization)	1.34964	1.35367	1.52922	0.0495346
VEGF Pathway (Cell Migration)	1.34964	1.35367	1.52922	0.0495346
VEGF Pathway (Cell Survival)	0.0652685	0.0220528	0.0454485	0.0495346
VEGF Pathway (Focal Adhesion Turnover)	-0.137368	-0.0170971	0.0841804	0.512691
VEGF Pathway (Gene Expression and Cell Proliferation via MAPK7)	-0.0995657	-0.214717	-0.161411	0.0495346
VEGF Pathway (Nitric Oxide Production)	0.357779	0.368492	0.330355	0.0495346
VEGF Pathway (Prostaglandin Production)	-0.10336	-0.143085	-0.0884459	0.0495346
WNT Main Pathway	-0.00145522	-0.00333326	0.0126851	0.512691
WNT Pathway (Cell Fate Proliferation Differentiation Adhesion and Survival)	-0.105363	-0.0686825	-0.1063	0.0495346
WNT Pathway (Cell Survival)	-0.0936046	-0.0638374	-0.0206194	0.0495346
WNT Pathway (Cytoskeletal Rearrangement)	-0.184983	-0.198764	-0.212382	0.0495346
WNT Pathway (Gene Expression via CREB3)	-0.0119112	-0.0315029	0.0675727	0.827259
WNT Pathway (NFAT Pathway)	-0.108947	-0.155998	-0.0593358	0.0495346
WNT Pathway (PKC Pathway)	-0.088138	-0.0953854	-0.0213466	0.12663
