# Supplementary material for: DNA repair in species with extreme lifespan differences
Source: Aging (Albany NY). 2015 Dec 30;7(12):1171–82. doi: 10.18632/aging.100866 (PMC4712340; doi:10.18632/aging.100866)
Supplement: Supplementary file 9 [file aging-07-1171-s009.xlsx]

## Sheet: S8
Table S8. Enriched GO biological process terms with higher expression in human than mouse liver
GO Term	Description	P-value	FDR q-value	Enrichment	N	B	n	b
GO:0006952	defense response	2.95e-07	0.00381	1.4	12517	507	3050	173
GO:0002376	immune system process	3.56e-07	0.0023	1.31	12517	799	3050	255
GO:0006954	inflammatory response	4.16e-07	0.00179	1.61	12517	227	3050	89
GO:0016126	sterol biosynthetic process	6.64e-06	0.0215	2.6	12517	30	3050	19
GO:0043043	peptide biosynthetic process	9.25e-06	0.0239	1.55	12517	209	3050	79
GO:0045428	regulation of nitric oxide biosynthetic process	1.02e-05	0.0219	2.38	12517	38	3050	22
GO:1903426	regulation of reactive oxygen species biosynthetic process	1.19e-05	0.0219	2.23	12517	46	3050	25
GO:0006955	immune response	2.23e-05	0.036	1.37	12517	405	3050	135
GO:0002526	acute inflammatory response	2.52e-05	0.0361	2.44	12517	32	3050	19
GO:1902622	regulation of neutrophil migration	3e-05	0.0388	2.63	12517	25	3050	16
GO:0044283	small molecule biosynthetic process	3.24e-05	0.038	1.44	12517	276	3050	97
GO:1901564	organonitrogen compound metabolic process	3.33e-05	0.0359	1.22	12517	966	3050	288
GO:0050896	response to stimulus	3.79e-05	0.0377	1.12	12517	2699	3050	737
GO:0009617	response to bacterium	3.84e-05	0.0354	1.71	12517	113	3050	47
GO:0006518	peptide metabolic process	4.07e-05	0.0351	1.45	12517	257	3050	91
GO:0044057	regulation of system process	4.44e-05	0.0359	1.38	12517	361	3050	121
GO:0043207	response to external biotic stimulus	5.04e-05	0.0383	1.39	12517	334	3050	113
GO:0002684	positive regulation of immune system process	5.73e-05	0.0411	1.32	12517	462	3050	149
GO:0071622	regulation of granulocyte chemotaxis	6.04e-05	0.041	2.53	12517	26	3050	16
GO:0043604	amide biosynthetic process	6.85e-05	0.0442	1.43	12517	267	3050	93
GO:0033993	response to lipid	7.18e-05	0.0442	1.37	12517	354	3050	118
GO:0002682	regulation of immune system process	7.48e-05	0.0439	1.24	12517	767	3050	232
GO:1903201	regulation of oxidative stress-induced cell death	8.01e-05	0.045	2.29	12517	34	3050	19
GO:1903428	positive regulation of reactive oxygen species biosynthetic process	8.01e-05	0.0431	2.29	12517	34	3050	19
GO:0009607	response to biotic stimulus	8.22e-05	0.0425	1.36	12517	355	3050	118
GO:0019221	cytokine-mediated signaling pathway	9.48e-05	0.0471	1.63	12517	126	3050	50
GO:1903522	regulation of blood circulation	9.6e-05	0.0459	1.52	12517	178	3050	66
GO:0042221	response to chemical	0.000105	0.0486	1.17	12517	1310	3050	375
GO:0043603	cellular amide metabolic process	0.000114	0.0508	1.35	12517	361	3050	119
GO:1901566	organonitrogen compound biosynthetic process	0.000125	0.054	1.28	12517	552	3050	172
GO:0010941	regulation of cell death	0.000129	0.0539	1.19	12517	1134	3050	328
GO:0010942	positive regulation of cell death	0.000132	0.0533	1.31	12517	462	3050	147
GO:0051050	positive regulation of transport	0.000132	0.0518	1.24	12517	703	3050	213
GO:0048584	positive regulation of response to stimulus	0.000134	0.0509	1.18	12517	1241	3050	356
GO:2000377	regulation of reactive oxygen species metabolic process	0.000142	0.0525	1.64	12517	115	3050	46
GO:0043068	positive regulation of programmed cell death	0.000143	0.0515	1.31	12517	434	3050	139
GO:0002700	regulation of production of molecular mediator of immune response	0.000146	0.0509	1.84	12517	69	3050	31
GO:1903524	positive regulation of blood circulation	0.000147	0.0499	1.77	12517	81	3050	35
GO:0006953	acute-phase response	0.000176	0.0582	2.74	12517	18	3050	12
GO:0008652	cellular amino acid biosynthetic process	0.000187	0.0603	1.91	12517	58	3050	27
GO:0006412	translation	0.000189	0.0595	1.47	12517	195	3050	70
GO:0010033	response to organic substance	0.000196	0.0601	1.19	12517	1026	3050	298
GO:0044281	small molecule metabolic process	0.000197	0.0591	1.19	12517	1045	3050	303
GO:0016125	sterol metabolic process	0.000197	0.0578	1.75	12517	82	3050	35
GO:0043065	positive regulation of apoptotic process	0.000207	0.0593	1.31	12517	430	3050	137
GO:0002523	leukocyte migration involved in inflammatory response	0.000209	0.0586	4.1	12517	6	3050	6
GO:0090257	regulation of muscle system process	0.000212	0.0582	1.57	12517	136	3050	52
GO:0014823	response to activity	0.000221	0.0595	2.82	12517	16	3050	11
GO:1901700	response to oxygen-containing compound	0.00024	0.0632	1.24	12517	680	3050	205
GO:0006950	response to stress	0.000259	0.0669	1.14	12517	1636	3050	456
GO:0048518	positive regulation of biological process	0.000269	0.0681	1.08	12517	3775	3050	997
GO:0000097	sulfur amino acid biosynthetic process	0.00027	0.0671	2.93	12517	14	3050	10
GO:1902624	positive regulation of neutrophil migration	0.000279	0.068	2.54	12517	21	3050	13
GO:0006695	cholesterol biosynthetic process	0.000284	0.0679	2.37	12517	26	3050	15
GO:1902653	secondary alcohol biosynthetic process	0.000284	0.0667	2.37	12517	26	3050	15
GO:0010035	response to inorganic substance	0.000294	0.0678	1.43	12517	218	3050	76
GO:0032101	regulation of response to external stimulus	0.000339	0.0769	1.26	12517	551	3050	169
GO:1904407	positive regulation of nitric oxide metabolic process	0.000358	0.0798	2.26	12517	29	3050	16
GO:0045429	positive regulation of nitric oxide biosynthetic process	0.000358	0.0784	2.26	12517	29	3050	16
GO:0002687	positive regulation of leukocyte migration	0.00036	0.0776	1.74	12517	78	3050	33
GO:0019229	regulation of vasoconstriction	0.000365	0.0773	1.87	12517	57	3050	26
GO:0006956	complement activation	0.000371	0.0773	2.59	12517	19	3050	12
GO:0090022	regulation of neutrophil chemotaxis	0.000371	0.0761	2.59	12517	19	3050	12
GO:2000379	positive regulation of reactive oxygen species metabolic process	0.000376	0.0759	1.8	12517	66	3050	29
GO:0080134	regulation of response to stress	0.000474	0.0942	1.2	12517	834	3050	244
GO:0071624	positive regulation of granulocyte chemotaxis	0.000488	0.0955	2.66	12517	17	3050	11
GO:0002697	regulation of immune effector process	0.00049	0.0945	1.38	12517	249	3050	84
GO:0072376	protein activation cascade	0.000496	0.0942	2.28	12517	27	3050	15
GO:1901607	alpha-amino acid biosynthetic process	0.000502	0.0941	1.87	12517	55	3050	25
GO:0002237	response to molecule of bacterial origin	0.000517	0.0953	1.51	12517	147	3050	54
GO:0032496	response to lipopolysaccharide	0.000541	0.0983	1.53	12517	134	3050	50
GO:0045933	positive regulation of muscle contraction	0.000544	0.0977	2.05	12517	38	3050	19
GO:0050830	defense response to Gram-positive bacterium	0.000544	0.0963	2.05	12517	38	3050	19
GO:1903034	regulation of response to wounding	0.000562	0.0981	1.36	12517	278	3050	92
GO:0002702	positive regulation of production of molecular mediator of immune response	0.000627	0.108	1.96	12517	44	3050	21
GO:1901032	negative regulation of response to reactive oxygen species	0.000633	0.108	2.74	12517	15	3050	10
GO:1903205	regulation of hydrogen peroxide-induced cell death	0.000633	0.106	2.74	12517	15	3050	10
GO:0006959	humoral immune response	0.000677	0.112	1.89	12517	50	3050	23
GO:0061572	actin filament bundle organization	0.000683	0.112	2.11	12517	33	3050	17
GO:0051707	response to other organism	0.000735	0.119	1.39	12517	224	3050	76
GO:0043067	regulation of programmed cell death	0.000785	0.125	1.17	12517	1046	3050	298
GO:0051222	positive regulation of protein transport	0.00079	0.125	1.31	12517	334	3050	107
GO:1902883	negative regulation of response to oxidative stress	0.000828	0.129	2.2	12517	28	3050	15
GO:1900408	negative regulation of cellular response to oxidative stress	0.000828	0.127	2.2	12517	28	3050	15
GO:0009605	response to external stimulus	0.000881	0.134	1.2	12517	733	3050	215
GO:0002690	positive regulation of leukocyte chemotaxis	0.000935	0.141	1.88	12517	48	3050	22
GO:0051017	actin filament bundle assembly	0.000953	0.142	2.12	12517	31	3050	16
GO:0030595	leukocyte chemotaxis	0.000961	0.141	1.82	12517	54	3050	24
GO:0010755	regulation of plasminogen activation	0.000983	0.143	2.98	12517	11	3050	8
GO:0009086	methionine biosynthetic process	0.000983	0.141	2.98	12517	11	3050	8
