# Supplementary material for: DNA repair in species with extreme lifespan differences
Source: Aging (Albany NY). 2015 Dec 30;7(12):1171–82. doi: 10.18632/aging.100866 (PMC4712340; doi:10.18632/aging.100866)
Supplement: Supplementary file 10 [file aging-07-1171-s010.xlsx]

## Sheet: S9
Table S9. Enriched GO biological process terms with higher expression in NMR than mouse liver
GO Term	Description	P-value	FDR q-value	Enrichment	N	B	n	b
GO:0019083	viral transcription	7.53e-12	9.81e-08	2.34	12636	72	3670	49
GO:0000184	nuclear-transcribed mRNA catabolic process, nonsense-mediated decay	1.13e-08	7.35e-05	2.03	12636	83	3670	49
GO:0006613	cotranslational protein targeting to membrane	3.93e-08	0.000171	2.04	12636	76	3670	45
GO:0006614	SRP-dependent cotranslational protein targeting to membrane	4.67e-08	0.000152	2.05	12636	74	3670	44
GO:0072599	establishment of protein localization to endoplasmic reticulum	5.69e-08	0.000148	2	12636	79	3670	46
GO:0019058	viral life cycle	1.08e-07	0.000235	1.88	12636	97	3670	53
GO:0000956	nuclear-transcribed mRNA catabolic process	1.33e-07	0.000247	1.73	12636	135	3670	68
GO:0070972	protein localization to endoplasmic reticulum	1.33e-07	0.000217	1.95	12636	83	3670	47
GO:0045047	protein targeting to ER	1.39e-07	0.000201	1.99	12636	76	3670	44
GO:0019439	aromatic compound catabolic process	5.45e-07	0.00071	1.46	12636	295	3670	125
GO:1901361	organic cyclic compound catabolic process	1.47e-06	0.00174	1.43	12636	314	3670	130
GO:0006402	mRNA catabolic process	1.62e-06	0.00176	1.64	12636	145	3670	69
GO:0044270	cellular nitrogen compound catabolic process	2.53e-06	0.00253	1.43	12636	288	3670	120
GO:0006401	RNA catabolic process	3.83e-06	0.00357	1.57	12636	164	3670	75
GO:0016043	cellular component organization	4.7e-06	0.00408	1.1	12636	3648	3670	1163
GO:0071840	cellular component organization or biogenesis	9.23e-06	0.00751	1.09	12636	3673	3670	1167
GO:0046700	heterocycle catabolic process	1.15e-05	0.00882	1.4	12636	287	3670	117
GO:0034655	nucleobase-containing compound catabolic process	1.29e-05	0.00934	1.43	12636	253	3670	105
GO:0006414	translational elongation	1.59e-05	0.0109	1.58	12636	142	3670	65
GO:0016071	mRNA metabolic process	3.09e-05	0.0201	1.32	12636	402	3670	154
GO:0043043	peptide biosynthetic process	3.51e-05	0.0218	1.42	12636	235	3670	97
GO:0006518	peptide metabolic process	3.51e-05	0.0208	1.37	12636	296	3670	118
GO:0006415	translational termination	3.97e-05	0.0225	1.57	12636	129	3670	59
GO:0006412	translation	4.5e-05	0.0244	1.43	12636	219	3670	91
GO:0006612	protein targeting to membrane	4.63e-05	0.0241	1.56	12636	135	3670	61
GO:0043603	cellular amide metabolic process	9.62e-05	0.0482	1.29	12636	422	3670	158
GO:0022607	cellular component assembly	9.88e-05	0.0477	1.15	12636	1347	3670	451
GO:0006807	nitrogen compound metabolic process	0.000103	0.0478	1.08	12636	3792	3670	1189
GO:0034641	cellular nitrogen compound metabolic process	0.000219	0.0983	1.08	12636	3528	3670	1106
GO:0090150	establishment of protein localization to membrane	0.000229	0.0996	1.39	12636	210	3670	85
GO:0006725	cellular aromatic compound metabolic process	0.000238	0.1	1.09	12636	3137	3670	989
GO:0043604	amide biosynthetic process	0.000248	0.101	1.33	12636	296	3670	114
GO:0043933	macromolecular complex subunit organization	0.000268	0.106	1.13	12636	1569	3670	515
GO:0010467	gene expression	0.00027	0.104	1.21	12636	644	3670	227
GO:1901360	organic cyclic compound metabolic process	0.000272	0.101	1.08	12636	3304	3670	1038
GO:0031056	regulation of histone modification	0.000288	0.104	1.64	12636	82	3670	39
GO:0043241	protein complex disassembly	0.000294	0.104	1.43	12636	168	3670	70
GO:0006413	translational initiation	0.00042	0.144	1.43	12636	164	3670	68
GO:0043931	ossification involved in bone maturation	0.000599	0.2	3.44	12636	6	3670	6
GO:1903308	regulation of chromatin modification	0.000627	0.204	1.57	12636	90	3670	41
GO:0007224	smoothened signaling pathway	0.000645	0.205	1.67	12636	66	3670	32
GO:0022411	cellular component disassembly	0.00065	0.202	1.24	12636	465	3670	167
GO:0090304	nucleic acid metabolic process	0.000734	0.222	1.09	12636	2658	3670	839
GO:0046483	heterocycle metabolic process	0.000854	0.253	1.08	12636	3120	3670	976
GO:1902275	regulation of chromatin organization	0.000883	0.255	1.54	12636	94	3670	42
GO:0007156	homophilic cell adhesion via plasma membrane adhesion molecules	0.000893	0.253	1.61	12636	75	3670	35
GO:0010632	regulation of epithelial cell migration	0.000938	0.26	1.46	12636	125	3670	53
GO:0032984	macromolecular complex disassembly	0.000953	0.259	1.39	12636	174	3670	70
GO:0072657	protein localization to membrane	0.000959	0.255	1.31	12636	257	3670	98
