# Supplementary material for: DNA repair in species with extreme lifespan differences
Source: Aging (Albany NY). 2015 Dec 30;7(12):1171–82. doi: 10.18632/aging.100866 (PMC4712340; doi:10.18632/aging.100866)
Supplement: Supplementary file 11 [file aging-07-1171-s011.xlsx]

## Sheet: S10
Table S10. Enriched GO biological process terms with higher expression in mouse than human liver
GO Term	Description	P-value	FDR q-value	Enrichment	N	B	n	b
GO:0070647	protein modification by small protein conjugation or removal	1.47e-07	0.00151	1.27	4892	177	3150	145
GO:0006464	cellular protein modification process	1.66e-07	0.000853	1.14	4892	628	3150	461
GO:0036211	protein modification process	1.66e-07	0.000569	1.14	4892	628	3150	461
GO:0006996	organelle organization	3.77e-07	0.000969	1.13	4892	676	3150	492
GO:0043412	macromolecule modification	1.13e-06	0.00232	1.13	4892	656	3150	476
GO:1902589	single-organism organelle organization	5.98e-06	0.0103	1.13	4892	538	3150	392
GO:0032446	protein modification by small protein conjugation	3.54e-05	0.0521	1.24	4892	147	3150	117
GO:0050770	regulation of axonogenesis	3.7e-05	0.0477	1.36	4892	63	3150	55
GO:0016567	protein ubiquitination	4.29e-05	0.0491	1.24	4892	139	3150	111
GO:0000209	protein polyubiquitination	4.88e-05	0.0503	1.39	4892	49	3150	44
GO:0009987	cellular process	5.5e-05	0.0515	1.03	4892	3309	3150	2192
GO:0016197	endosomal transport	6.93e-05	0.0595	1.35	4892	61	3150	53
GO:0016579	protein deubiquitination	7.06e-05	0.0559	1.5	4892	28	3150	27
GO:0006325	chromatin organization	0.00013	0.0955	1.21	4892	162	3150	126
GO:0044267	cellular protein metabolic process	0.000144	0.099	1.09	4892	719	3150	506
GO:0016043	cellular component organization	0.000152	0.0976	1.07	4892	1270	3150	871
GO:0009894	regulation of catabolic process	0.000169	0.103	1.18	4892	198	3150	151
GO:0044260	cellular macromolecule metabolic process	0.000191	0.109	1.06	4892	1471	3150	1002
GO:0016568	chromatin modification	0.000223	0.115	1.21	4892	149	3150	116
GO:0051301	cell division	0.000261	0.128	1.25	4892	106	3150	85
GO:0070646	protein modification by small protein removal	0.000268	0.125	1.45	4892	30	3150	28
GO:0051179	localization	0.000338	0.151	1.07	4892	1147	3150	787
GO:0031329	regulation of cellular catabolic process	0.000364	0.156	1.19	4892	167	3150	128
GO:0016569	covalent chromatin modification	0.000548	0.226	1.25	4892	92	3150	74
GO:0048812	neuron projection morphogenesis	0.00055	0.218	1.27	4892	81	3150	66
GO:0018205	peptidyl-lysine modification	0.000559	0.213	1.3	4892	62	3150	52
GO:0016570	histone modification	0.000598	0.22	1.25	4892	88	3150	71
GO:0071840	cellular component organization or biogenesis	0.000607	0.216	1.06	4892	1289	3150	878
GO:0044265	cellular macromolecule catabolic process	0.000657	0.225	1.19	4892	147	3150	113
