# Supplementary material for: DNA repair in species with extreme lifespan differences
Source: Aging (Albany NY). 2015 Dec 30;7(12):1171–82. doi: 10.18632/aging.100866 (PMC4712340; doi:10.18632/aging.100866)
Supplement: Supplementary file 12 [file aging-07-1171-s012.xlsx]

## Sheet: S11
Table S11. Enriched GO biological process terms with higher expression in mouse than NMR liver
GO Term	Description	P-value	FDR q-value	Enrichment	N	B	n	b
GO:0044281	small molecule metabolic process	1.66e-10	2.14e-06	1.31	12495	1045	3438	377
GO:0051188	cofactor biosynthetic process	1.21e-07	0.000778	1.99	12495	84	3438	46
GO:0044710	single-organism metabolic process	2.19e-07	0.000942	1.15	12495	2568	3438	810
GO:0009108	coenzyme biosynthetic process	2.34e-07	0.000755	2.14	12495	61	3438	36
GO:0051186	cofactor metabolic process	3.78e-07	0.000976	1.59	12495	206	3438	90
GO:1901564	organonitrogen compound metabolic process	1.38e-06	0.00298	1.24	12495	966	3438	330
GO:0006732	coenzyme metabolic process	2.31e-06	0.00426	1.6	12495	173	3438	76
GO:0019637	organophosphate metabolic process	4.3e-06	0.00695	1.33	12495	485	3438	178
GO:0006082	organic acid metabolic process	6.26e-06	0.00899	1.29	12495	599	3438	213
GO:0009056	catabolic process	7.4e-06	0.00956	1.21	12495	1032	3438	345
GO:1901575	organic substance catabolic process	1.18e-05	0.0138	1.24	12495	822	3438	280
GO:0019752	carboxylic acid metabolic process	1.47e-05	0.0158	1.3	12495	532	3438	190
GO:0044255	cellular lipid metabolic process	1.5e-05	0.0149	1.3	12495	513	3438	184
GO:0034976	response to endoplasmic reticulum stress	1.74e-05	0.016	1.69	12495	110	3438	51
GO:0043436	oxoacid metabolic process	2.05e-05	0.0176	1.28	12495	586	3438	206
GO:0006457	protein folding	2.78e-05	0.0224	1.68	12495	106	3438	49
GO:0044248	cellular catabolic process	3.58e-05	0.0272	1.22	12495	866	3438	290
GO:0044712	single-organism catabolic process	3.72e-05	0.0267	1.28	12495	549	3438	193
GO:1903573	negative regulation of response to endoplasmic reticulum stress	8.38e-05	0.057	2.23	12495	31	3438	19
GO:0006729	tetrahydrobiopterin biosynthetic process	0.000119	0.0768	3.63	12495	7	3438	7
GO:0032787	monocarboxylic acid metabolic process	0.000133	0.0818	1.35	12495	301	3438	112
GO:0055114	oxidation-reduction process	0.000141	0.0827	1.25	12495	567	3438	195
GO:1901615	organic hydroxy compound metabolic process	0.000153	0.0861	1.36	12495	277	3438	104
GO:0006629	lipid metabolic process	0.000195	0.105	1.22	12495	685	3438	230
GO:0046486	glycerolipid metabolic process	0.000263	0.136	1.44	12495	182	3438	72
GO:0044282	small molecule catabolic process	0.000264	0.131	1.46	12495	167	3438	67
GO:0006958	complement activation, classical pathway	0.000291	0.139	2.67	12495	15	3438	11
GO:0008610	lipid biosynthetic process	0.000303	0.14	1.32	12495	316	3438	115
GO:0001678	cellular glucose homeostasis	0.000357	0.159	2.02	12495	36	3438	20
GO:0044711	single-organism biosynthetic process	0.000381	0.164	1.2	12495	712	3438	236
GO:0000038	very long-chain fatty acid metabolic process	0.000511	0.213	2.36	12495	20	3438	13
GO:0046146	tetrahydrobiopterin metabolic process	0.000722	0.292	3.18	12495	8	3438	7
GO:0006644	phospholipid metabolic process	0.000768	0.301	1.39	12495	194	3438	74
GO:0009116	nucleoside metabolic process	0.000877	0.333	1.44	12495	149	3438	59
